# Supplementary material
Source: MDPI journal article supplement (https://www.mdpi.com/2073-445X/12/2/493)
Supplement: s1 [file s1]

## Red Panda Governance Survey / रेड पाण्डा संरक्षणको लागि सुशासन सर्वेक्षण

This survey is about Red Panda conservation programmes, natural habitat protection and the Red Panda Network. You do not need to have detailed knowledge about red panda conservation programmes, natural habitat protection, or the Red Panda Network. The survey is intended to find out your views about forest governance generally, Red panda conservation programmes, natural habitat protection, and the Red Panda Network.

यो सर्वेक्षण रेड पाण्डा र यसको प्राकृतिक वासस्थानको संरक्षण कार्यक्रमहरू र रेड पाण्डा नेटवर्क संग सम्बन्धित छ । तपाईंसँग रेड पाण्डा र यसको प्राकृतिक वासस्थान संरक्षण, वा रेड पाण्डा नेटवर्कको बारेमा विस्तृत जानकारी हुनु आवश्यक छैन । मुलतः यो सर्वेक्षण वन क्षेत्रको सुशासनमा तपाईंको दृष्टिकोण बुझनलाई गरिएको हो । साथै यसले रेड पाण्डा र यसको प्राकृतिक वासस्थान संरक्षण कार्यक्रमहरू र रेड पाण्डा नेटवर्क प्रतिको तपाईंको धारणा बुझ्न पनि सहयोग गर्नेछ ।

Please answer the questions in the following ways

कृपया तलको एक तरीकाबाट उत्तर दिनुहोस् ।

1) English, using English font

OR/अथवा

2) अंग्रेजी अक्षर प्रयोग गरेर नेपालीमा

Please answer all questions otherwise your response cannot be considered in this study.

तपाईंको सहभागितालाई यस अध्ययनमा समावेश गर्नको लागि सबै प्रश्नहरूको जवाफ आवश्यक पर्ने हुनाले कृपया सबै प्रश्नहरूको उत्तर दिनुहोला ।

You may also answer using Roman font if you want to

तपाईंको आफ्नो कम्प्युटर वा मोबाईल फोनमा नेपाली अक्षर लेख्न/टाइप गर्न अप्ठेरो छ भने आफ्नो उत्तर रोमन नेपालीमा पनि लेख्न सक्नुहुनेछ ।

Tapainko afno computer wa mobile phonema nepali acchyaer lekhna/type garna apthyaro cha bhane aafnoo uttar roman nepalima lekhna saknuhunecha.

1. Please specify to which sector you belong:

तपाईं कुन क्षेत्रसँग सम्बन्धित हुनुहुन्छ छान्नुहोस्:

- ☐ Donor organisation (दातृ संस्था)
- ☐ Community forest users (सामुदायिक बन समुह)
- ☐ Dalit (दलित)
- ☐ Private sector (निजी क्षेत्र)
- ☐ Forest-based industry(वनमा आधारित उद्योग)
- ☐ Government(सरकारी निकाय)
- ☐ Indigenous peoples' organisation(आदिवासी जनजाति संस्था)
- ☐ Madheshi(मधेशी)
- ☐ Non-governmental organisation(गैर सरकारी संस्था)
- ☐ Womens' organisation (महिला संस्था)
- ☐ Youth (युवा)
- ☐ Herder's group (पशुपालक समुह)
- ☐ Media/Journalist (पत्रकार)
- ☐ Tourism operator (पर्यटन व्यवसायी)
- ☐ Research/Academic (अनुसन्धान/शैक्षिक संस्था)
- ☐ Zoological organisation (जुलोजिकल संस्था)
- ☐ Other (अन्य)

If 'other' please specify (यदि अन्य भएमा उल्लेख गर्नुहोस्)

2. This question concerns the level of inclusiveness in forest governance generally, Red panda conservation programmes, natural habitat protection and the Red Panda network.

यो प्रश्न वन क्षेत्रको सुशासनमा समावेशिकरणको अवस्था , रेड पान्डा र यसको प्राकृतिक वासस्थान संरक्षण कार्यक्रमहरु र रेड पाण्डा नेटवर्क सँग सम्बन्धित छ ।

Do you think these activities are inclusive of your interests?

तपाईंलाई यी गतिविधिहरुमा तपाईंको चाहनाको समावेशिकरण आवश्यक छ भन्ने ठान्नु हुन्छ?

What rating would you give?

यसलाई स्केलमा कसरी जनाउँनुहुन्छ ?

|                                                                                                                                            | Very low/[धेरै कम]    | Low/[कम]              | Medium/[ठिकै]         | High/[धेरै]           | Very high/[अतिधेरै]   |
|--------------------------------------------------------------------------------------------------------------------------------------------|-----------------------|-----------------------|-----------------------|-----------------------|-----------------------|
| Forest governance generally                                                                                                                | <input type="radio"/> |
| Please provide comments as to how you think this could be improved here:/[तपाइको बिचारमा यसलाई कसरि सुधार् गर्न सकिन्छ ? सुझाव दिनुहोस् ।] |                       |                       |                       |                       |                       |
| <div></div>                                                                                                                                |                       |                       |                       |                       |                       |
| Red panda conservation programmes                                                                                                          | <input type="radio"/> |
| Please provide comments as to how you think this could be improved here:/[तपाइको बिचारमा यसलाई कसरि सुधार् गर्न सकिन्छ ? सुझाव दिनुहोस् ।] |                       |                       |                       |                       |                       |
| <div></div>                                                                                                                                |                       |                       |                       |                       |                       |
| Natural habitat protection                                                                                                                 | <input type="radio"/> |
| Please provide comments as to how you think this could be improved here:/[तपाइको बिचारमा यसलाई कसरि सुधार् गर्न सकिन्छ ? सुझाव दिनुहोस् ।] |                       |                       |                       |                       |                       |
| <div></div>                                                                                                                                |                       |                       |                       |                       |                       |
| Red Panda Network                                                                                                                          | <input type="radio"/> |
| Please provide comments as to how you think this could be improved here:/[तपाइको बिचारमा यसलाई कसरि सुधार् गर्न सकिन्छ ? सुझाव दिनुहोस् ।] |                       |                       |                       |                       |                       |
| <div></div>                                                                                                                                |                       |                       |                       |                       |                       |

3. This question concerns the degree to which these activities treat all interests equally.

[यो प्रश्न रेड प्लस प्रक्रियामा सबैको चाहनालाई कतिहद सम्म समान रूपले ध्यान दिनुपर्ने हुन्छ भन्ने सग सम्बन्धित छ ।]

Do you think these activities treat all interests equally?

[तपाइको बिचारमा रेड प्लसले सबैको चाहनालाई समान रूपले ध्यान दिन्छ ?]

What rating would you give?

[यसलाई स्केलमा बताउदा कस्तो भन्नुहुन्छ ?]

Very low/[धेरै कम]    Low/[कम]    Medium/[ठिकै]    High/[धेरै]    Very high/[अतिधेरै]

Forest governance generally

☐ ☐ ☐ ☐ ☐

Please provide comments as to how you think this could be improved here: [तपाइको बिचारमा यसलाई कसरि सुधार् गर्न सकिन्छ ? सुझाव दिनुहोस् ।]

Red panda conservation programmes

☐ ☐ ☐ ☐ ☐

Please provide comments as to how you think this could be improved here: [तपाइको बिचारमा यसलाई कसरि सुधार् गर्न सकिन्छ ? सुझाव दिनुहोस् ।]

Natural habitat protection

☐ ☐ ☐ ☐ ☐

Please provide comments as to how you think this could be improved here: [तपाइको बिचारमा यसलाई कसरि सुधार् गर्न सकिन्छ ? सुझाव दिनुहोस् ।]

Red Panda Network

☐ ☐ ☐ ☐ ☐

Please provide comments as to how you think this could be improved here: [तपाइको बिचारमा यसलाई कसरि सुधार् गर्न सकिन्छ ? सुझाव दिनुहोस् ।]

4. This question concerns the extent to which these activities provide resources (economic, technical, institutional) for you to participate.

[यो प्रश्न रेड प्लसले तपाइको सहभागिताको लागि कति सम्म स्रोत (अर्थिक, प्रविधिक, सस्थागत) उपलब्ध गराउछ भन्ने सँग सम्बन्धित छ ।]

What level of resources do these activities provide for you to participate?

[तपाइको सहभागिताको लागि रेड प्लसले कति सम्म स्रोत उपलब्ध गराउछ ?]

What rating would you give?

[यसलाई स्केलमा बताउदा कस्तो भन्नुहुन्छ ?]

|                                                                                                                                            | Very low/[धेरै कम]    | Low/[कम]              | Medium/[ठिकै]         | High/[धेरै]           | Very high/[अतिधेरै]   |
|--------------------------------------------------------------------------------------------------------------------------------------------|-----------------------|-----------------------|-----------------------|-----------------------|-----------------------|
| Forest governance generally                                                                                                                | <input type="radio"/> |
| Please provide comments as to how you think this could be improved here: [तपाइको बिचारमा यसलाई कसरि सुधार् गर्न सकिन्छ ? सुझाव दिनुहोस् ।] |                       |                       |                       |                       |                       |
| <div></div>                                                                                                                                |                       |                       |                       |                       |                       |
| Red panda conservation programmes                                                                                                          | <input type="radio"/> |
| Please provide comments as to how you think this could be improved here: [तपाइको बिचारमा यसलाई कसरि सुधार् गर्न सकिन्छ ? सुझाव दिनुहोस् ।] |                       |                       |                       |                       |                       |
| <div></div>                                                                                                                                |                       |                       |                       |                       |                       |
| Natural habitat protection                                                                                                                 | <input type="radio"/> |
| Please provide comments as to how you think this could be improved here: [तपाइको बिचारमा यसलाई कसरि सुधार् गर्न सकिन्छ ? सुझाव दिनुहोस् ।] |                       |                       |                       |                       |                       |
| <div></div>                                                                                                                                |                       |                       |                       |                       |                       |
| Red Panda Network                                                                                                                          | <input type="radio"/> |
| Please provide comments as to how you think this could be improved here: [तपाइको बिचारमा यसलाई कसरि सुधार् गर्न सकिन्छ ? सुझाव दिनुहोस् ।] |                       |                       |                       |                       |                       |
| <div></div>                                                                                                                                |                       |                       |                       |                       |                       |

5. This question concerns the extent to which these activities can be considered to be acting in an accountable manner.

[यो प्रस्न रेड प्लसले गर्ने काम कुनहद सम्म उत्तरदायी मान्न सकिन्छ भन्ने सग सम्बन्धित छ ।]

Do you think these activities act in an accountable manner?

[तपाइको बिचारमा रेड प्लस ले कतिको उत्तरदायी ढगवाट काम् गर्छ?]

What rating would you give?

[यसलाइ स्केलमा बताउदा कस्तो भन्नुहुन्छ ?]

Very low/[धेरै कम]    Low/[कम]    Medium/[ठिकै]    High/[धेरै]    Very high/[अतिधेरै]

Forest governance generally

☐☐☐☐☐

Please provide comments as to how you think this could be improved here: [तपाइको बिचारमा यसलाइ कसरि सुधार् गर्न सकिन्छ ? सुझाव दिनुहोस् ।]

Red panda conservation programmes

☐☐☐☐☐

Please provide comments as to how you think this could be improved here: [तपाइको बिचारमा यसलाइ कसरि सुधार् गर्न सकिन्छ ? सुझाव दिनुहोस् ।]

Natural habitat protection

☐☐☐☐☐

Please provide comments as to how you think this could be improved here: [तपाइको बिचारमा यसलाइ कसरि सुधार् गर्न सकिन्छ ? सुझाव दिनुहोस् ।]

Red Panda Network

☐☐☐☐☐

Please provide comments as to how you think this could be improved here: [तपाइको बिचारमा यसलाइ कसरि सुधार् गर्न सकिन्छ ? सुझाव दिनुहोस् ।]

6. This question concerns the level of transparency of these activities.

[यो प्रश्न रेड प्लसमा पारदर्शिताको तह सँग सम्बन्धित छ ।]

Do you think these activities act in a transparent manner?

[तपाइँको बिचारमा रेड प्लसले पारदर्शि ढगवाट काम गर्छ ?]

What rating would you give?

[यसलाई स्केलमा बताउदा कस्तो भन्नुहुन्छ ?]

Very low/[धेरै कम]    Low/[कम]    Medium/[ठिकै]    High/[धेरै]    Very high/[अतिधेरै]

Forest governance generally

☐ ☐ ☐ ☐ ☐

Please provide comments as to how you think this could be improved here: [तपाइँको बिचारमा यसलाई कसरि सुधार् गर्न सकिन्छ ? सुझाव दिनुहोस् ।]

Red panda conservation programmes

☐ ☐ ☐ ☐ ☐

Please provide comments as to how you think this could be improved here: [तपाइँको बिचारमा यसलाई कसरि सुधार् गर्न सकिन्छ ? सुझाव दिनुहोस् ।]

Natural habitat protection

☐ ☐ ☐ ☐ ☐

Please provide comments as to how you think this could be improved here: [तपाइँको बिचारमा यसलाई कसरि सुधार् गर्न सकिन्छ ? सुझाव दिनुहोस् ।]

Red Panda Network

☐ ☐ ☐ ☐ ☐

Please provide comments as to how you think this could be improved here: [तपाइँको बिचारमा यसलाई कसरि सुधार् गर्न सकिन्छ ? सुझाव दिनुहोस् ।]

7. This question concerns the extent to which you consider the deliberations in these activities to be productive.

[यो प्रस्न विवेचनाले रेड प्लस उपलब्धिमुलक बनाउन सहयोग गर्छ भन्ने सग सम्बन्धित छ ।]

Do you think deliberations in these activities are productive?

[तपाइको बिचारमा विवेचनाले रेड प्लसलाई कतिको उपलब्धिमुलक बनाउछ?]

What rating would you give?

[यसलाई स्केलमा बताउदा कस्तो भन्नुहुन्छ ?]

|                                                                                                                                            | Very low/[धेरै कम]    | Low/[कम]              | Medium/[ठिकै]         | High/[धेरै]           | Very high/[अतिधेरै]   |
|--------------------------------------------------------------------------------------------------------------------------------------------|-----------------------|-----------------------|-----------------------|-----------------------|-----------------------|
| Forest governance generally                                                                                                                | <input type="radio"/> |
| Please provide comments as to how you think this could be improved here: [तपाइको बिचारमा यसलाई कसरि सुधार् गर्न सकिन्छ ? सुझाव दिनुहोस् ।] |                       |                       |                       |                       |                       |
| <div></div>                                                                                                                                |                       |                       |                       |                       |                       |
| Red panda conservation programmes                                                                                                          | <input type="radio"/> |
| Please provide comments as to how you think this could be improved here: [तपाइको बिचारमा यसलाई कसरि सुधार् गर्न सकिन्छ ? सुझाव दिनुहोस् ।] |                       |                       |                       |                       |                       |
| <div></div>                                                                                                                                |                       |                       |                       |                       |                       |
| Natural habitat protection                                                                                                                 | <input type="radio"/> |
| Please provide comments as to how you think this could be improved here: [तपाइको बिचारमा यसलाई कसरि सुधार् गर्न सकिन्छ ? सुझाव दिनुहोस् ।] |                       |                       |                       |                       |                       |
| <div></div>                                                                                                                                |                       |                       |                       |                       |                       |
| Red Panda Network                                                                                                                          | <input type="radio"/> |
| Please provide comments as to how you think this could be improved here: [तपाइको बिचारमा यसलाई कसरि सुधार् गर्न सकिन्छ ? सुझाव दिनुहोस् ।] |                       |                       |                       |                       |                       |
| <div></div>                                                                                                                                |                       |                       |                       |                       |                       |

8. This question concerns the level of democracy in these activities.

[यो प्रश्न रेड प्लसको प्रजातान्त्रिक पद्धतिसँग सम्बन्धित छ ।]

Do you consider these activities act in a democratic manner?

[तपाइँको बिचारमा रेड प्लसले कतिको प्रजातान्त्रिक तरिकाबाट काम गर्छ?]

What rating would you give?

[यसलाई स्केलमा बताउदा कस्तो भन्नुहुन्छ ?]

|                                                                                                                                             | Very low/[धेरै कम]    | Low/[कम]              | Medium/[ठिकै]         | High/[धेरै]           | Very high/[अतिधेरै]   |
|---------------------------------------------------------------------------------------------------------------------------------------------|-----------------------|-----------------------|-----------------------|-----------------------|-----------------------|
| Forest governance generally                                                                                                                 | <input type="radio"/> |
| Please provide comments as to how you think this could be improved here: [तपाइँको बिचारमा यसलाई कसरि सुधार् गर्न सकिन्छ ? सुझाव दिनुहोस् ।] |                       |                       |                       |                       |                       |
| <div></div>                                                                                                                                 |                       |                       |                       |                       |                       |
| Red panda conservation programmes                                                                                                           | <input type="radio"/> |
| Please provide comments as to how you think this could be improved here: [तपाइँको बिचारमा यसलाई कसरि सुधार् गर्न सकिन्छ ? सुझाव दिनुहोस् ।] |                       |                       |                       |                       |                       |
| <div></div>                                                                                                                                 |                       |                       |                       |                       |                       |
| Natural habitat protection                                                                                                                  | <input type="radio"/> |
| Please provide comments as to how you think this could be improved here: [तपाइँको बिचारमा यसलाई कसरि सुधार् गर्न सकिन्छ ? सुझाव दिनुहोस् ।] |                       |                       |                       |                       |                       |
| <div></div>                                                                                                                                 |                       |                       |                       |                       |                       |
| Red Panda Network                                                                                                                           | <input type="radio"/> |
| Please provide comments as to how you think this could be improved here: [तपाइँको बिचारमा यसलाई कसरि सुधार् गर्न सकिन्छ ? सुझाव दिनुहोस् ।] |                       |                       |                       |                       |                       |
| <div></div>                                                                                                                                 |                       |                       |                       |                       |                       |

9. This question concerns the way in which agreements are reached in these activities.

[यो प्रश्न रेड प्लस सम्झौताको तरिकासँग सम्बन्धित छ ।]

Do you consider the making of agreements in these activities to be effective?

[तपाइँको बिचारमा रेड प्लसको सम्झौताको कतिको प्रभावकरि हुन्छ?]

What rating would you give?

[यसलाई स्केलमा बताउदा कस्तो भन्नुहुन्छ ?]

|                                                                                                                                             | Very low/[धेरै कम]    | Low/[कम]              | Medium/[ठिकै]         | High/[धेरै]           | Very high/[अतिधेरै]   |
|---------------------------------------------------------------------------------------------------------------------------------------------|-----------------------|-----------------------|-----------------------|-----------------------|-----------------------|
| Forest governance generally                                                                                                                 | <input type="radio"/> |
| Please provide comments as to how you think this could be improved here: [तपाइँको बिचारमा यसलाई कसरि सुधार् गर्न सकिन्छ ? सुझाव दिनुहोस् ।] |                       |                       |                       |                       |                       |
| <div></div>                                                                                                                                 |                       |                       |                       |                       |                       |
| Red panda conservation programmes                                                                                                           | <input type="radio"/> |
| Please provide comments as to how you think this could be improved here: [तपाइँको बिचारमा यसलाई कसरि सुधार् गर्न सकिन्छ ? सुझाव दिनुहोस् ।] |                       |                       |                       |                       |                       |
| <div></div>                                                                                                                                 |                       |                       |                       |                       |                       |
| Natural habitat protection                                                                                                                  | <input type="radio"/> |
| Please provide comments as to how you think this could be improved here: [तपाइँको बिचारमा यसलाई कसरि सुधार् गर्न सकिन्छ ? सुझाव दिनुहोस् ।] |                       |                       |                       |                       |                       |
| <div></div>                                                                                                                                 |                       |                       |                       |                       |                       |
| Red Panda Networkk                                                                                                                          | <input type="radio"/> |
| Please provide comments as to how you think this could be improved here: [तपाइँको बिचारमा यसलाई कसरि सुधार् गर्न सकिन्छ ? सुझाव दिनुहोस् ।] |                       |                       |                       |                       |                       |
| <div></div>                                                                                                                                 |                       |                       |                       |                       |                       |

10. This question concerns the way in which disputes are settled in these activities.

[यो प्रश्न रेड प्लसको विवाद समाधानको तरिकासँग सम्बन्धित छ ।]

Do you consider the settling of disputes in these activities to be effective?

[तपाइँको विचारमा रेड प्लसमा विवाद समाधान कतिको प्रभावकारी हुन्छ?]

What rating would you give?

[यसलाई स्केलमा बताउदा कस्तो भन्नुहुन्छ ?]

|                                                                                                                                             | Very low/[धेरै कम]    | Low/[कम]              | Medium/[ठिकै]         | High/[धेरै]           | Very high/[अतिधेरै]   |
|---------------------------------------------------------------------------------------------------------------------------------------------|-----------------------|-----------------------|-----------------------|-----------------------|-----------------------|
| Forest governance generally                                                                                                                 | <input type="radio"/> |
| Please provide comments as to how you think this could be improved here: [तपाइँको विचारमा यसलाई कसरी सुधार् गर्न सकिन्छ ? सुझाव दिनुहोस् ।] |                       |                       |                       |                       |                       |
| <div></div>                                                                                                                                 |                       |                       |                       |                       |                       |
| Red panda conservation programmes                                                                                                           | <input type="radio"/> |
| Please provide comments as to how you think this could be improved here: [तपाइँको विचारमा यसलाई कसरी सुधार् गर्न सकिन्छ ? सुझाव दिनुहोस् ।] |                       |                       |                       |                       |                       |
| <div></div>                                                                                                                                 |                       |                       |                       |                       |                       |
| Natural habitat protection                                                                                                                  | <input type="radio"/> |
| Please provide comments as to how you think this could be improved here: [तपाइँको विचारमा यसलाई कसरी सुधार् गर्न सकिन्छ ? सुझाव दिनुहोस् ।] |                       |                       |                       |                       |                       |
| <div></div>                                                                                                                                 |                       |                       |                       |                       |                       |
| Red Panda Network                                                                                                                           | <input type="radio"/> |
| Please provide comments as to how you think this could be improved here: [तपाइँको विचारमा यसलाई कसरी सुधार् गर्न सकिन्छ ? सुझाव दिनुहोस् ।] |                       |                       |                       |                       |                       |
| <div></div>                                                                                                                                 |                       |                       |                       |                       |                       |

11. This question concerns the degree to which you think these activities will contribute to changing the behaviour that leads to the loss of the Red panda and red panda habitat.

[यो प्रस्न रेड प्लसले वन विनास तथा वन क्षयिकरण बढाउने व्यवहार परिवर्तनमा कतिको योगदान गर्छ भन्ने सग सम्बन्धित छ ।]

Do you think these activities will contribute to changing the behaviour that leads to leads to the loss of Red panda habitat?

[तपाइको विचारमा रेड प्लसले वन विनास तथा वन क्षयिकरण बढाउने व्यवहार परिवर्तनमा कतिको योगदान गर्छ?]

What rating would you give?

[यसलाई स्केलमा बताउदा कस्तो भन्नुहुन्छ ?]

|                                                                                                                                           | Very low/[धेरै कम]    | Low/[कम]              | Medium/[ठिकै]         | High/[धेरै]           | Very high/[अतिधेरै]   |
|-------------------------------------------------------------------------------------------------------------------------------------------|-----------------------|-----------------------|-----------------------|-----------------------|-----------------------|
| Forest governance generally                                                                                                               | <input type="radio"/> |
| Please provide comments as to how you think this could be improved here: [तपाइको बिचारमा यसलाई कसरि सुधार गर्न सकिन्छ ? सुझाव दिनुहोस् ।] |                       |                       |                       |                       |                       |
| <div></div>                                                                                                                               |                       |                       |                       |                       |                       |
| Red panda conservation programmes                                                                                                         | <input type="radio"/> |
| Please provide comments as to how you think this could be improved here: [तपाइको बिचारमा यसलाई कसरि सुधार गर्न सकिन्छ ? सुझाव दिनुहोस् ।] |                       |                       |                       |                       |                       |
| <div></div>                                                                                                                               |                       |                       |                       |                       |                       |
| Natural habitat protection                                                                                                                | <input type="radio"/> |
| Please provide comments as to how you think this could be improved here: [तपाइको बिचारमा यसलाई कसरि सुधार गर्न सकिन्छ ? सुझाव दिनुहोस् ।] |                       |                       |                       |                       |                       |
| <div></div>                                                                                                                               |                       |                       |                       |                       |                       |
| Red Panda Network                                                                                                                         | <input type="radio"/> |
| Please provide comments as to how you think this could be improved here: [तपाइको बिचारमा यसलाई कसरि सुधार गर्न सकिन्छ ? सुझाव दिनुहोस् ।] |                       |                       |                       |                       |                       |
| <div></div>                                                                                                                               |                       |                       |                       |                       |                       |

12. This question concerns the degree to which you think these activities will help solve the problems of the loss of the Red panda and Red panda habitat.

[यो प्रश्न रेड प्लसले वन विनास तथा वन क्षयिकरण को समस्या समधान गर्न कतिको सहयोग गर्छ भन्ने सग सम्बन्धित छ ।]

Do you think these activities will help solve the problems of the loss of the Red panda and red panda habitat?

[तपाइको विचारमा रेड प्लसले वन विनास तथा वन क्षयिकरण को समस्या समधान गर्न कतिको सहयोग गर्छ?]

What rating would you give?

[यसलाई स्केलमा बताउदा कस्तो भन्नुहुन्छ ?]

|                                                                                                                                            | Very low/[धेरै कम]    | Low/[कम]              | Medium/[ठिकै]         | High/[धेरै]           | Very high/[अतिधेरै]   |
|--------------------------------------------------------------------------------------------------------------------------------------------|-----------------------|-----------------------|-----------------------|-----------------------|-----------------------|
| Forest governance generally                                                                                                                | <input type="radio"/> |
| Please provide comments as to how you think this could be improved here: [तपाइको बिचारमा यसलाई कसरि सुधार् गर्न सकिन्छ ? सुझाव दिनुहोस् ।] |                       |                       |                       |                       |                       |
| <div></div>                                                                                                                                |                       |                       |                       |                       |                       |
| Red panda conservation programmes                                                                                                          | <input type="radio"/> |
| Please provide comments as to how you think this could be improved here: [तपाइको बिचारमा यसलाई कसरि सुधार् गर्न सकिन्छ ? सुझाव दिनुहोस् ।] |                       |                       |                       |                       |                       |
| <div></div>                                                                                                                                |                       |                       |                       |                       |                       |
| Natural habitat protection                                                                                                                 | <input type="radio"/> |
| Please provide comments as to how you think this could be improved here: [तपाइको बिचारमा यसलाई कसरि सुधार् गर्न सकिन्छ ? सुझाव दिनुहोस् ।] |                       |                       |                       |                       |                       |
| <div></div>                                                                                                                                |                       |                       |                       |                       |                       |
| Red Panda Network                                                                                                                          | <input type="radio"/> |
| Please provide comments as to how you think this could be improved here: [तपाइको बिचारमा यसलाई कसरि सुधार् गर्न सकिन्छ ? सुझाव दिनुहोस् ।] |                       |                       |                       |                       |                       |
| <div></div>                                                                                                                                |                       |                       |                       |                       |                       |

13. This question concerns the durability of these activities in terms of the extent to which the activities will last, and the flexibility and adaptability of these activities in the light of changing circumstances. Given this understanding of durability:

[यो प्रश्न रेड प्लस कार्यक्रम परिवर्तित अवस्थामा टिकावट (दिगोपना, लचकता तथा आनुकुलता भएको) कतिको छ भन्ने सग सम्बन्धित छ ।]

Do you consider these activities to be durable?

[तपाइको विचारमा रेड प्लस कार्यक्रम परिवर्तित अवस्थामा कतिको टिकावट छ ?]

What rating would you give?

[यसलाई स्केलमा बताउदा कस्तो भन्नुहुन्छ ?]

Very low/[धेरै कम]    Low/[कम]    Medium/[ठिकै]    High/[धेरै]    Very high/[अतिधेरै]

Forest governance generally

☐ ☐ ☐ ☐ ☐

Please provide comments as to how you think this could be improved here: [तपाइको विचारमा यसलाई कसरि सुधार् गर्न सकिन्छ ? सुझाव दिनुहोस् ।]

Red panda conservation programmes

☐ ☐ ☐ ☐ ☐

Please provide comments as to how you think this could be improved here: [तपाइको विचारमा यसलाई कसरि सुधार् गर्न सकिन्छ ? सुझाव दिनुहोस् ।]

Natural habitat protection

☐ ☐ ☐ ☐ ☐

Please provide comments as to how you think this could be improved here: [तपाइको विचारमा यसलाई कसरि सुधार् गर्न सकिन्छ ? सुझाव दिनुहोस् ।]

Red panda Network

☐ ☐ ☐ ☐ ☐

Please provide comments as to how you think this could be improved here: [तपाइको विचारमा यसलाई कसरि सुधार् गर्न सकिन्छ ? सुझाव दिनुहोस् ।]

14. Would you be prepared to take part in a follow up interview? If yes, please provide your name, organisation, email and telephone number in the spaces below:

[तपाईं अर्को अन्तर्वार्तामा सहभागि हुन चाहनुहुन्छ ? चाहनुहुन्छ भने नाम, ईमेल, ठेगाना, फोन नम्बर दिनुहोस । ]

Name/[नाम]:

Organisation/[संस्थाको नाम]:

Email/[ईमेल]

Telephone/[फोन नम्बर]:

15. Are there any comments you would like to make?

[तपाईंको केहि थप भनाइहरु छन कि?]
